# Supplementary material for: Using patient comments from a standardised experience survey to investigate their perceptions and prioritise improvement actions: a thematic and syntactic analysis
Source: Springer Nature journal article supplement (doi:10.1186/s12913-023-09953-z), 2023-09-14
Supplement: MOESM1 [file 26042932]

## APPENDICES

Appendix 1. Example of themes and sub-themes with their positive and negative qualification, taken from the e-Satis verbatims of the HCL.

| THEME: Catering                             |                                            |                                    |                                            | THEME: Perception of staff                |                                            |                                              |                                            |
|---------------------------------------------|--------------------------------------------|------------------------------------|--------------------------------------------|-------------------------------------------|--------------------------------------------|----------------------------------------------|--------------------------------------------|
| Sub-theme: cooking / temperature            |                                            | Sub-theme: variety                 |                                            | Sub-theme: approachable                   |                                            | Sub-theme: patience                          |                                            |
| Words and expressions included              | Positive (1) or negative (2) qualification | Words and expressions included     | Positive (1) or negative (2) qualification | Words and expressions included            | Positive (1) or negative (2) qualification | Words and expressions included               | Positive (1) or negative (2) qualification |
| <i>bonne cuisson<br/>vapeur des légumes</i> | 1                                          | <i>manque de variété des menus</i> | 2                                          | <i>accessibilité du chirurgien</i>        | 1                                          | <i>chirurgien a été patient</i>              | 1                                          |
| <i>méthode de cuisson à revoir</i>          | 2                                          | <i>nourriture n'est pas variée</i> | 2                                          | <i>interne très accessible</i>            | 1                                          | <i>manque de patience cruelle</i>            | 2                                          |
| <i>pates souvent trop cuites</i>            | 2                                          | <i>repas plutôt bons et variés</i> | 1                                          | <i>personnels très avenants</i>           | 1                                          | <i>secrétaires très patientes</i>            | 1                                          |
| <i>viandes trop cuites et dures</i>         | 2                                          | <i>3 fois des pates</i>            | 2                                          | <i>équipes médicales très accessibles</i> | 1                                          | <i>une grande patience avec les patients</i> | 1                                          |
| (...)                                       |                                            | (...)                              |                                            | (...)                                     |                                            | (...)                                        |                                            |

Appendix 2. List of the 28 general themes and 184 specific sub-themes from the HCL e-Satis verbatims.

| Theme                                    | N°                                | Sub-theme                          | Theme                         | N°                         | Sub-theme                    |            |
|------------------------------------------|-----------------------------------|------------------------------------|-------------------------------|----------------------------|------------------------------|------------|
| <b>1. Accessibility / identification</b> | 1                                 | Accessibility                      | <b>Maternity</b>              | 93                         | Nursery                      |            |
|                                          | 2                                 | Orientation                        |                               | 94                         | Physiological                |            |
|                                          | 3                                 | Parking                            |                               | 95                         | Post-partum                  |            |
|                                          | 4                                 | Staff identification               |                               | 96                         | Choices respected            |            |
| <b>2. Administrative</b>                 | 5                                 | Patient file                       |                               | 97                         | Personalised medicine        |            |
|                                          | 6                                 | Rates and payments                 |                               | 98                         | Care response to emergencies |            |
|                                          | 7                                 | Social security                    | 99                            | Dosage                     |                              |            |
| <b>3. Bedroom and bathroom</b>           | 8                                 | Furnishing                         | <b>16. Medical monitoring</b> | 100                        | Medical monitoring           |            |
|                                          | 9                                 | Bathroom general condition         |                               | 101                        | Medical follow-up            |            |
|                                          | 10                                | Bedroom general condition          |                               | 102                        | Medications                  |            |
|                                          | 11                                | Comfort                            |                               | 103                        | Postoperative follow-up      |            |
|                                          | 12                                | Neighbour                          |                               | 104                        | Prescription                 |            |
|                                          | 13                                | Quality of the bed                 |                               | 105                        | Protocols                    |            |
|                                          | 14                                | Shower                             |                               | 106                        | Side effects                 |            |
|                                          | 15                                | Single or shared room              | 107                           | Staff visits               |                              |            |
|                                          | <b>4. Catering / Food service</b> | 16                                 | Size of the room              | <b>17. Medical results</b> | 108                          | Reports    |
|                                          |                                   | 17                                 | Sleep and rest                |                            | 109                          | Diagnostic |
| 18                                       |                                   | Toilet                             | 110                           |                            | Health results               |            |
| 19                                       |                                   | Washing and toilet products        | 111                           |                            | Rehabilitation               |            |
| <b>4. Catering / Food service</b>        | 20                                | Appropriate to the patient's needs | <b>18. Nursing care</b>       | 112                        | Diaper                       |            |
|                                          | 21                                | Adapted quantities                 |                               | 113                        | Care procedures              |            |
|                                          | 22                                | Appetizing                         |                               | 114                        | Dressing, bandage            |            |
|                                          | 23                                | Breakfast                          | <b>19. Operative</b>          | 115                        | Patient hygiene              |            |
|                                          | 24                                | Food service (general)             |                               | 116                        | Anaesthesia                  |            |
|                                          | 25                                | Containers                         |                               | 117                        | Care before the surgery      |            |
|                                          | 26                                | Expiry date                        |                               | 118                        | Postoperative                |            |
|                                          | 27                                | Flavour                            |                               | 119                        | Recovery room                |            |
|                                          | 28                                | Fruits, vegetables                 |                               | 120                        | Scars, stitches              |            |

|                                           |                     |                                                                       |                                  |                                  |                                               |                 |
|-------------------------------------------|---------------------|-----------------------------------------------------------------------|----------------------------------|----------------------------------|-----------------------------------------------|-----------------|
|                                           | 29                  | Mealtime                                                              |                                  | 121                              | Operative                                     |                 |
|                                           | 30                  | Quality of the products                                               |                                  | 122                              | Acknowledgements of the patients              |                 |
|                                           | 31                  | Cooking / temperature                                                 |                                  | 123                              | Body parts                                    |                 |
|                                           | 32                  | Variety                                                               |                                  | 124                              | Clothing                                      |                 |
|                                           | 33                  | Water, drinks                                                         |                                  | 125                              | Floor names                                   |                 |
| <b>5. Cleanliness</b>                     | 34                  | Cleanliness of the environment                                        | <b>20. Other sub-themes</b>      | 126                              | Generic terms for hospitalisation             |                 |
|                                           | 35                  | Cleanliness of the patient's room                                     |                                  | 127                              | Generic terms for institution                 |                 |
| <b>6. Communication &amp; information</b> | 36                  | Patient agreement                                                     |                                  | 128                              | Generic terms for patient                     |                 |
|                                           | 37                  | Advice                                                                |                                  | 129                              | Generic terms for treatment                   |                 |
|                                           | 38                  | Answers provided to questions                                         |                                  | 130                              | Night                                         |                 |
|                                           | 39                  | Appointments                                                          |                                  | 131                              | Paediatric department                         |                 |
|                                           | 40                  | Clarity of explanations                                               |                                  | 132                              | Intensive care department                     |                 |
|                                           | 41                  | Consideration of requests                                             |                                  | 133                              | Transfer                                      |                 |
|                                           | 42                  | Contradictory opinions                                                |                                  | <b>21. Pain</b>                  | 134                                           | Pain killers    |
|                                           | 43                  | General information                                                   |                                  |                                  | 135                                           | Pain management |
|                                           | 44                  | Sufficient information                                                | <b>22. Parents and relatives</b> | 136                              | Parents and relatives                         |                 |
|                                           | 45                  | Phone contact                                                         |                                  | 137                              | Visiting procedure                            |                 |
| <b>7. Confidentiality and privacy</b>     | 46                  | Medical secrecy                                                       | <b>23. Public institution</b>    | 138                              | Perception of public hospital                 |                 |
|                                           | 47                  | Respect of privacy                                                    |                                  | 139                              | Spending                                      |                 |
| <b>8. Entry</b>                           | 48                  | Admission                                                             | <b>24. Perception of staff</b>   | 140                              | Approachable                                  |                 |
|                                           | 49                  | Preadmission                                                          |                                  | 141                              | Attention given during diagnosis announcement |                 |
| <b>9. Environment</b>                     | 50                  | Animations and entertainments                                         |                                  | 142                              | Behaviours and attitudes (general)            |                 |
|                                           | 51                  | Atmosphere                                                            |                                  | 143                              | Honesty                                       |                 |
|                                           | 52                  | Chairs                                                                |                                  | 144                              | Involvement                                   |                 |
|                                           | 53                  | Ecology                                                               |                                  | 145                              | Kindness                                      |                 |
|                                           | 54                  | Equipment                                                             |                                  | 146                              | Listening                                     |                 |
|                                           | 55                  | Equipment for handicap situation                                      |                                  | 147                              | Patience                                      |                 |
|                                           | 56                  | Infrastructure (general)                                              |                                  | 148                              | Professionalism                               |                 |
|                                           | 57                  | Light, luminosity                                                     |                                  | 149                              | Reactivity                                    |                 |
|                                           | 58                  | Odours                                                                | 150                              | Respectful of religion           |                                               |                 |
|                                           | 59                  | Old or modern environment                                             | 151                              | Respect, consideration           |                                               |                 |
| <b>10. Examination</b>                    | 60                  | Sound comfort                                                         | 152                              | Support                          |                                               |                 |
|                                           | 61                  | Thermic comfort                                                       | 153                              | Trust                            |                                               |                 |
|                                           | 62                  | Examination                                                           | 154                              | Welcoming                        |                                               |                 |
|                                           | 63                  | Blood pressure                                                        | <b>25. Private services</b>      | 155                              | Happytial                                     |                 |
|                                           | 64                  | Perfusion, blood test                                                 |                                  | 156                              | Phone                                         |                 |
| 65                                        | Radiograph, doppler | 157                                                                   |                                  | Tv                               |                                               |                 |
| 66                                        | Scanner             | 158                                                                   |                                  | WIFI                             |                                               |                 |
| <b>11. Exit</b>                           | 67                  | Administrative process                                                | <b>26. Staff</b>                 | 159                              | Administrative                                |                 |
|                                           | 68                  | Discharge (general)                                                   |                                  | 160                              | Anaesthesiologist                             |                 |
|                                           | 69                  | Discharge information                                                 |                                  | 161                              | Care assistants                               |                 |
|                                           | 70                  | Follow-up after discharge                                             |                                  | 162                              | Caregivers                                    |                 |
|                                           | 71                  | Must return to hospital                                               |                                  | 163                              | General practitioner (out of hospital)        |                 |
|                                           | 72                  | Patient feels that his stay is too short                              |                                  | 164                              | Hospital porters                              |                 |
|                                           | 73                  | Return home                                                           |                                  | 165                              | Housekeeping staff                            |                 |
| <b>12. Feelings</b>                       | 74                  | Autonomy                                                              |                                  | 166                              | Interns                                       |                 |
|                                           | 75                  | Being surrounded vs. loneliness                                       |                                  | 167                              | Medical staff                                 |                 |
|                                           | 76                  | Fears, worries, anxieties                                             |                                  | 168                              | Midwives                                      |                 |
|                                           | 77                  | Feeling of security or insecurity                                     | 169                              | Night team                       |                                               |                 |
| <b>13. Overall organisation</b>           | 78                  | Psychological and social care                                         | 170                              | Nursery assistants               |                                               |                 |
|                                           | 79                  | Staff work overload                                                   | 171                              | Nurses                           |                                               |                 |
|                                           | 80                  | Organisation within the departments                                   | 172                              | Obstetricians and gynaecologists |                                               |                 |
|                                           | 81                  | Schedule during specific moments: weekends, holidays, public holidays | 173                              | Paramedical                      |                                               |                 |
|                                           | 82                  | Staff coordination                                                    | 174                              | Paediatrics                      |                                               |                 |
|                                           | 83                  | Team rotation                                                         | 175                              | Physical therapists              |                                               |                 |
|                                           | 84                  | Under-staffed                                                         | 176                              | Physicians                       |                                               |                 |
| <b>14. Maternity</b>                      | 85                  | Delivery                                                              | 177                              | Surgeons                         |                                               |                 |
|                                           | 86                  | Breastfeeding                                                         | 178                              | Teachers                         |                                               |                 |
|                                           | 87                  | Caesarean                                                             | 179                              | Undetermined staff               |                                               |                 |
|                                           | 88                  | Declaration of birth                                                  | <b>27. Transports</b>            | 180                              | Ambulance                                     |                 |
|                                           | 89                  | Epidural                                                              |                                  | 181                              | Taxi                                          |                 |
|                                           | 90                  | Father / close companion                                              |                                  | 182                              | Transport vouchers                            |                 |
|                                           | 91                  | Kangaroo department (fragile new-borns)                               | <b>28. Wait</b>                  | 183                              | Waiting times                                 |                 |
|                                           | 92                  | Maternity (general)                                                   |                                  | 184                              | Delays                                        |                 |

Appendix 3. Reasons for exclusion of the 2 themes and 39 sub-themes from the patient journey, based on the list of the 28 general themes and 184 specific sub-themes from the HCL e-Satis verbatims.

| Reason of exclusion                                                                                                                       | Use                                                                                                                                                | Themes and sub-themes                                                                                                                                                                                                                                                                                                                                                                                                                                                                                               |
|-------------------------------------------------------------------------------------------------------------------------------------------|----------------------------------------------------------------------------------------------------------------------------------------------------|---------------------------------------------------------------------------------------------------------------------------------------------------------------------------------------------------------------------------------------------------------------------------------------------------------------------------------------------------------------------------------------------------------------------------------------------------------------------------------------------------------------------|
| Theme and sub-themes that identified the staff but did not correspond to a sub-theme of the patient journey (n=1 theme; n=21 sub-themes). | Used to cross-reference sub-themes. For example, to study how many times the subject of listening is mentioned specifically in relation to nurses. | <b>26. Staff (theme)</b><br>159 Administrative<br>160 Anaesthesiologist<br>161 Care assistants<br>162 Caregivers<br>163 General practitioner (out of hospital)<br>164 Hospital porters<br>165 Housekeeping staff<br>166 Interns<br>167 Medical staff<br>168 Midwives<br>169 Night team<br>170 Nursery assistants<br>171 Nurses<br>172 Obstetricians and gynaecologists<br>173 Paramedical<br>174 Paediatrics<br>175 Physical therapists<br>176 Physicians<br>177 Surgeons<br>178 Teachers<br>179 Undetermined staff |
| Theme and sub-themes that did not present convincing                                                                                      | Not used.<br>(For example, the sub-theme “clothing” was                                                                                            | <b>20. Other (theme)</b><br>112 Diaper<br>123 Body parts<br>124 Clothing<br>125 Floor names                                                                                                                                                                                                                                                                                                                                                                                                                         |

|                                                                                          |                                                                                                                                                                                    |                                                                                                                                                             |
|------------------------------------------------------------------------------------------|------------------------------------------------------------------------------------------------------------------------------------------------------------------------------------|-------------------------------------------------------------------------------------------------------------------------------------------------------------|
| quantitative and qualitative results (n=1; n=9 sub-themes).                              | commented on by 0.3% of respondents with very low engagement).                                                                                                                     | 126 Generic terms for hospitalisation<br>127 Generic terms for institution<br>128 Generic terms for patient<br>129 Generic terms for treatment<br>130 Night |
| Generic sub-themes with very short words or expressions (1 or 2 words; n=5 sub-themes).  | Included for the generation of statistics of the theme (for instance when a patient just responded: “ <i>food</i> ”).                                                              | 24 Food service (general)<br>56 Infrastructure (general)<br>68 Discharge (general)<br>92 Maternity (general)<br>142 Behaviours and attitudes (general)      |
| Sub-themes redundant between quantitative and qualitative data (n=3 sub-themes).         | These 3 subjects were already identified in the quantitative data (for example, the information of the survey came from the paediatric department or elsewhere was already known). | 131 Paediatric department<br>132 Intensive care department<br>133 Transfer                                                                                  |
| Sub-theme that did not correspond to a sub-theme of the patient journey (n=1 sub-theme). | Used for HCL internal communication and for further research considering staff perceptions.                                                                                        | 122 Acknowledgements of the patients                                                                                                                        |
