# Supplementary material for: Using patient comments from a standardised experience survey to investigate their perceptions and prioritise improvement actions: a thematic and syntactic analysis
Source: Springer Nature journal article supplement (doi:10.1186/s12913-023-09953-z), 2023-09-14

Patient journey based on the analysis of e-Satis verbatims of the HCL

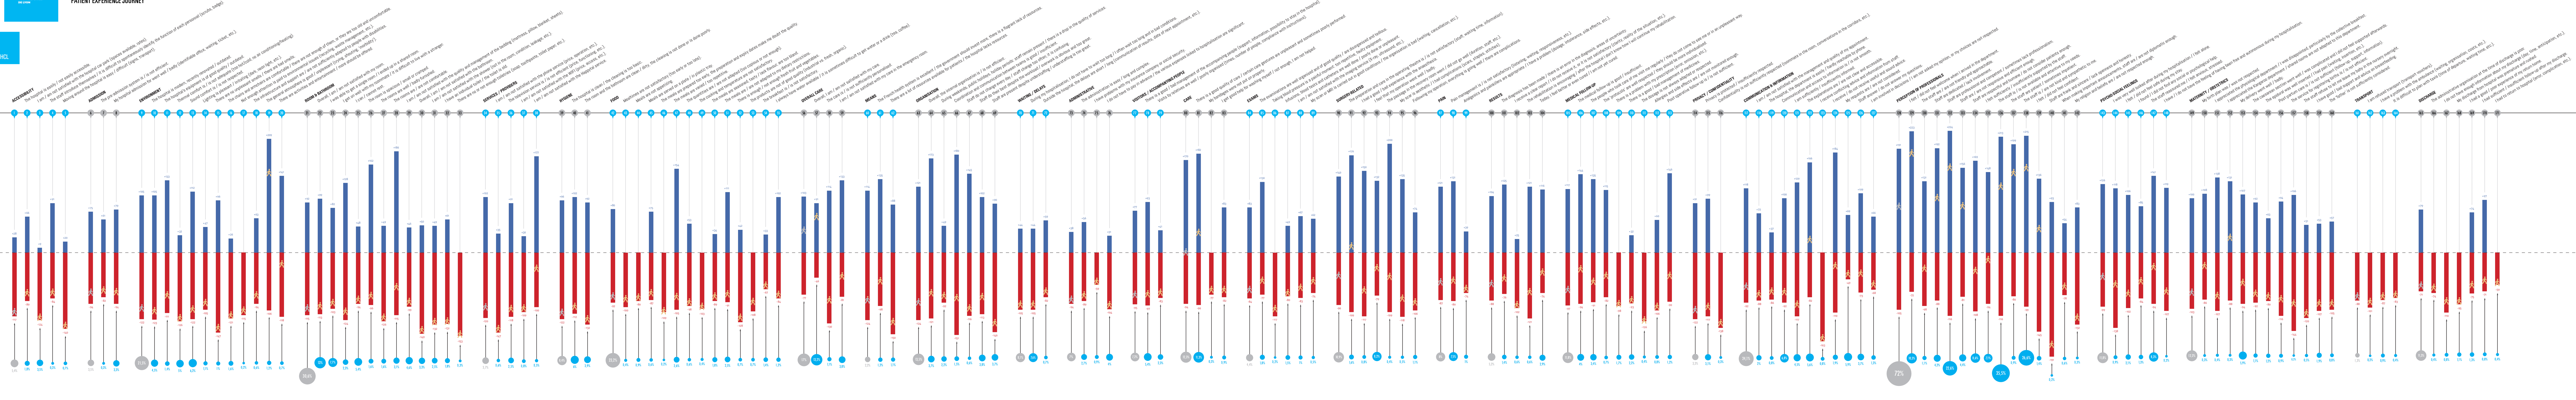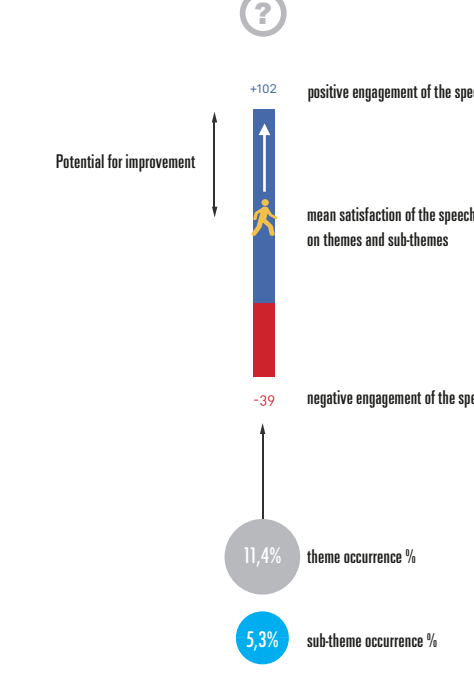

Supplement: MOESM2 [file 26042932]
